# Supplementary material for: Berberis vulgaris L. Root Extract as a Multi-Target Chemopreventive Agent against Colon Cancer Causing Apoptosis in Human Colon Adenocarcinoma Cell Lines
Source: MDPI journal article supplement (doi:10.3390/ijms25094786), 2024-04-27
Supplement: s1 [file s1]

Table S1. Primers sequences used in gene expression analysis.

| Gene name            | Primer sense 5'→3'     | Primer antisense 5'→3'    | Final concentration in PCR [nM] |
|----------------------|------------------------|---------------------------|---------------------------------|
| <b><i>GAPDH</i></b>  | AGAAGGCTGGGGCTCATTTG   | TGATGGCATGGACTGTGGTCAT    | 100                             |
| <b><i>HPRT1</i></b>  | GCTCCGTTATGGCGACCC     | GCAAGACGTTCAAGTCCTGTCC    | 450                             |
| <b><i>BCL2</i></b>   | CGCGACTCCTGATTCATTGG   | GTCTACTTCCTCTGTGATGTTGT   | 300                             |
| <b><i>BCL2L1</i></b> | CGATGGAGGAGGAAGCAAGC   | TCTGAAGGGAGAGAAAGAGATTCAA | 300                             |
| <b><i>BCL2L2</i></b> | GGGGCTGGGCGGAGTT       | CTCCACTTCTTCCAAGGGCA      | 450                             |
| <b><i>CASP3</i></b>  | CAGTGGAGGCCGACTTCTTG   | GCACAAAGCGACTGGATGAA      | 450                             |
| <b><i>CASP9</i></b>  | TCCTACTCTACTTTCCAGGTTT | CCCACTGCTCAAAGATGTCTG     | 450                             |
